# Supplementary material for: Combining flow synthesis and heterogeneous catalysis for the preparation of conjugated polymers
Source: Royal Society of Chemistry journal article supplement (doi:10.1039/d2py00362g), 2022-01-01
Supplement: d2py00362g1.pdf [file d2py00362g1.pdf]

## Supporting Information

### **Combining Flow Synthesis and Heterogenous Catalysis for the Preparation of Conjugated Polymers**

Seung-Hwan Jin ‡, Wonyoung Ko ‡, Seungjun Lee and Ye-Jin Hwang\*

Department of Chemistry and Chemical Engineering, Education and Research Center for  
Smart Energy and Materials, Inha University, 100 Inha-ro, Michuhol-gu, Incheon, Republic  
of Korea

*Email: [yjhwang@inha.ac.kr](mailto:yjhwang@inha.ac.kr)*

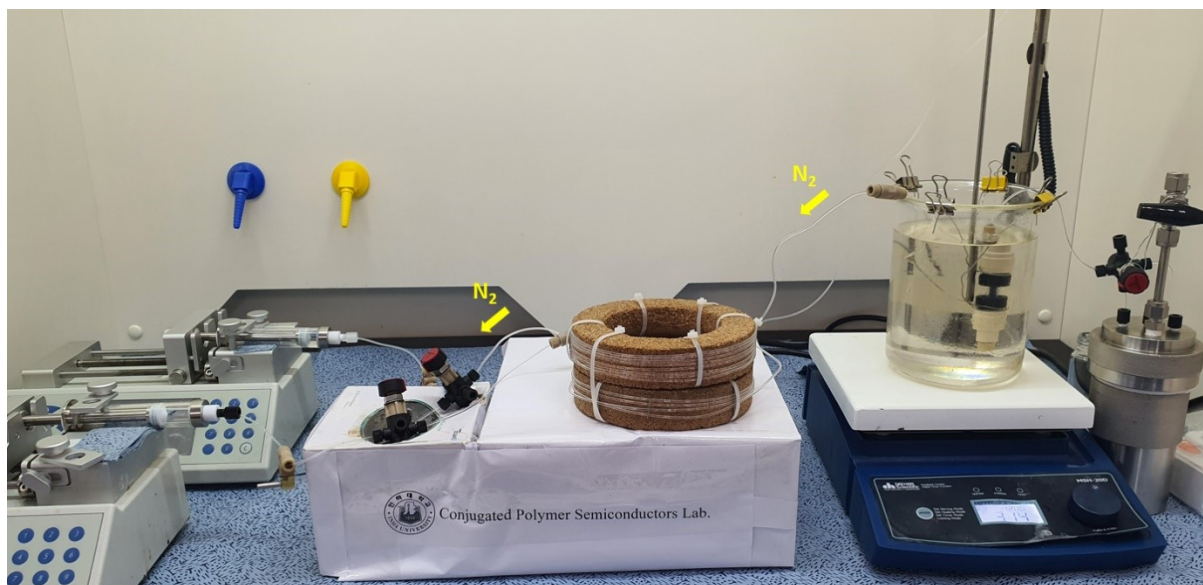

**Figure S1.** Picture of customized flow system with packed bed column reactor.

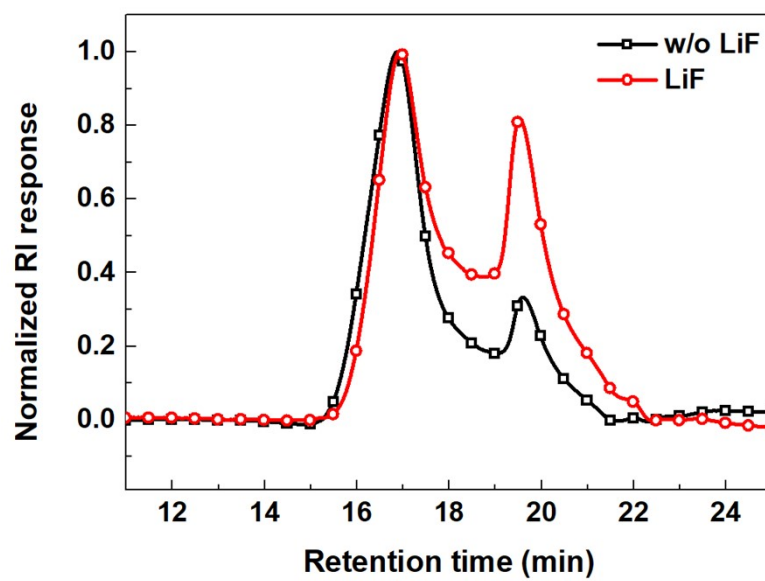

**Figure S2.** Normalized GPC traces of PTB7 product after batch reaction without and with LiF**Table S1.** GPC data of batch reaction without and with LiF

| entry | System  | $M_n$ [kDa] | $M_w$ [kDa] | $\mathcal{D}$ |
|-------|---------|-------------|-------------|---------------|
| 1     | w/o LiF | 7.3         | 26.1        | 3.581         |
| 2     | LiF     | 4.4         | 17.0        | 3.872         |

**Table S2.** Reproducibility data of molecular weights and  $\mathcal{D}$  for heterogeneous batch and heterogeneous flow synthesis.

| Entry | Reactor type | Reaction time | Temp. [°C] | $M_n$ [kDa] | $M_w$ [kDa] | $\mathcal{D}$ |
|-------|--------------|---------------|------------|-------------|-------------|---------------|
| 1     | flow         | 30 min        | 120        | 7.9         | 21.5        | 2.70          |
| 2     | flow         | 30 min        | 120        | 9.1         | 32.8        | 3.58          |
| 3     | flow         | 30 min        | 120        | 7.6         | 28.9        | 3.78          |
| 4     | batch        | 72 hr         | 120        | 9.3         | 27.8        | 2.99          |
| 5     | batch        | 72 hr         | 120        | 7.4         | 27.4        | 3.71          |
| 7     | batch        | 72 hr         | 120        | 5.7         | 22.0        | 3.88          |
| 8     | flow*        | 30 min        | 120        | 4.9         | 28.7        | 5.86          |
| 9     | flow*        | 30 min        | 120        | 6.1         | 27.1        | 4.44          |

\* flow synthesis without N<sub>2</sub> interlayer.

**Table S3.** Molecular weights and  $\mathcal{D}$  of PTB7 products with temperature of 110 °C, 120 °C and 130 °C.

| entry | Reaction time (min) | Temp. [°C] | $M_n$ [kDa]* | $M_w$ [kDa]* | $\mathcal{D}$ * |
|-------|---------------------|------------|--------------|--------------|-----------------|
| 1     | 30                  | 110        | 16.87 ± 0.5  | 36.25 ± 1.08 | 2.15 ± 0.02     |
| 2     | 30                  | 120        | 19.12 ± 0.96 | 36.16 ± 1.65 | 1.89 ± 0.05     |

3                      30                      130                       $10.63 \pm 2.10$                        $35.9 \pm 1.01$                        $2.59 \pm 0.25$

\* Molecular weights and molecular weight dispersity were averaged over three or more repeated runs. Only first 0.5 mL samples were collected and characterized.

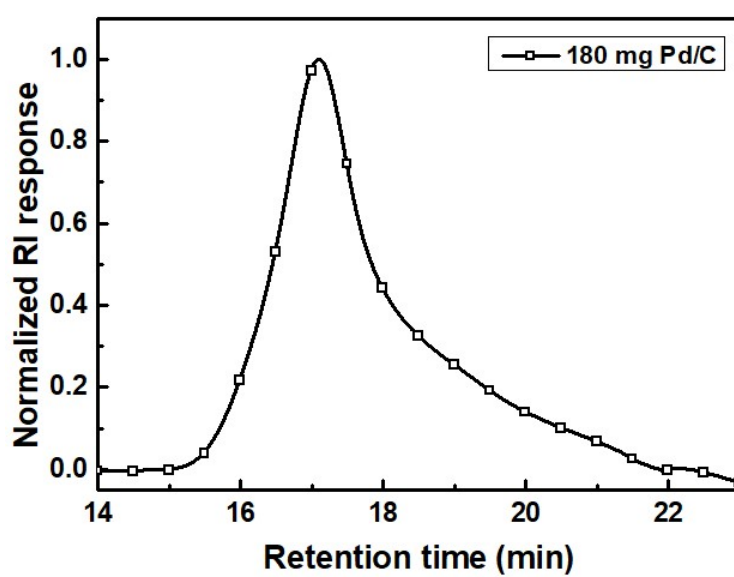

**Figure S3.** PTB7 samples collected all regions of the reaction mixture at same reaction conditions with 180 mg of Pd/C in the column reactor.

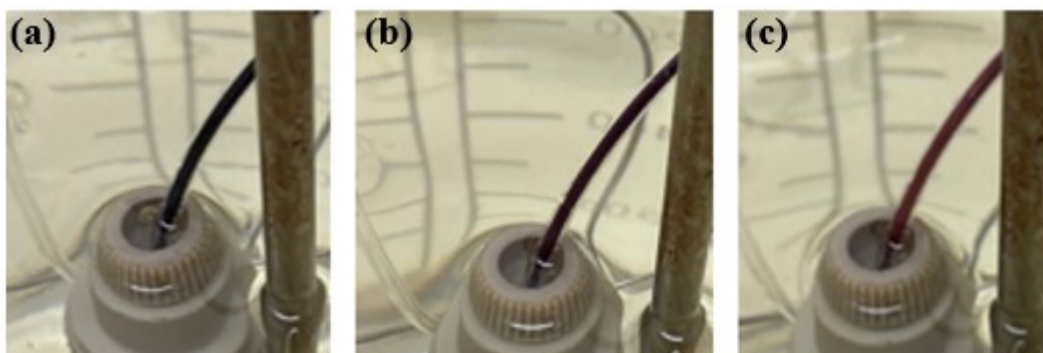

**Figure S4.** Picture of product color existing column by region. (a) region 1-2, (b) region 3, (c) region 4

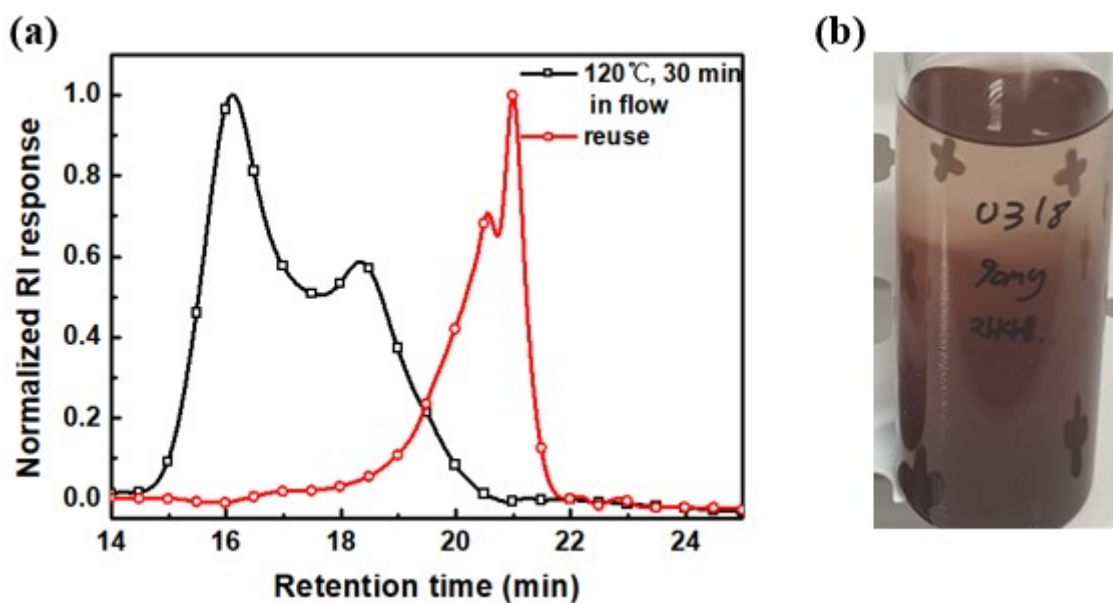

**Figure S5.** (a) Normalized GPC traces of PTB7 synthesized in flow at 120 °C for 30 minutes with a fresh Pd/C and reused Pd/C, and (b) picture of the sample collected from the reaction with reused Pd/C in methanol.

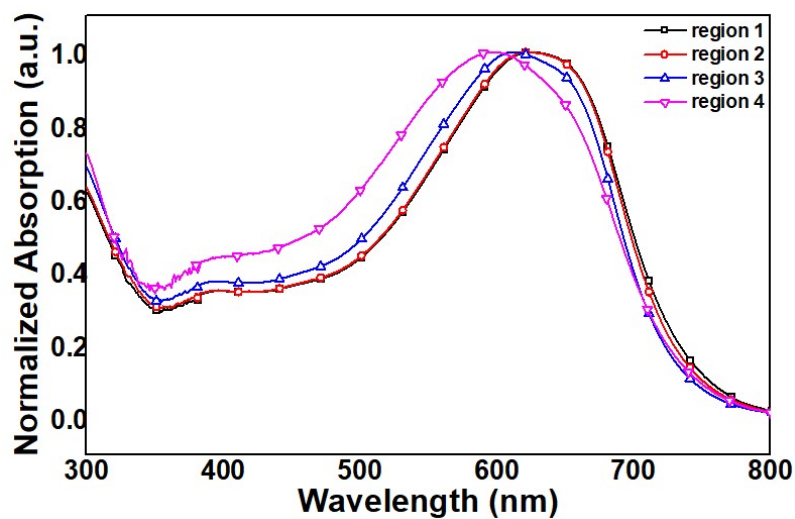

**Figure S6.** Absorption spectrum of PTB7 solution by different regions.

**Table S4.** Reproducibility data of molecular weights and  $\mathcal{D}$  for 1<sup>st</sup> region

| entry | Temp. [°C] | $M_n$ [kDa] | $M_w$ [kDa] | $\mathcal{D}$ |
|-------|------------|-------------|-------------|---------------|
| 1     | 120        | 18.9        | 36.1        | 1.91          |
| 2     | 120        | 20.8        | 38.9        | 1.87          |
| 3     | 120        | 19.1        | 34.7        | 1.82          |
| 4     | 120        | 18.4        | 35.3        | 1.92          |
| 5     | 120        | 18.7        | 36.3        | 1.94          |
| 6     | 110        | 16.8        | 36.1        | 2.15          |
| 7     | 110        | 16.2        | 34.8        | 2.15          |
| 8     | 110        | 17.2        | 37.3        | 2.17          |
| 9     | 110        | 17.3        | 36.8        | 2.13          |
| 10    | 130        | 16.8        | 36.1        | 2.15          |
| 11    | 130        | 16.2        | 34.8        | 2.15          |
| 12    | 130        | 17.3        | 36.8        | 2.13          |

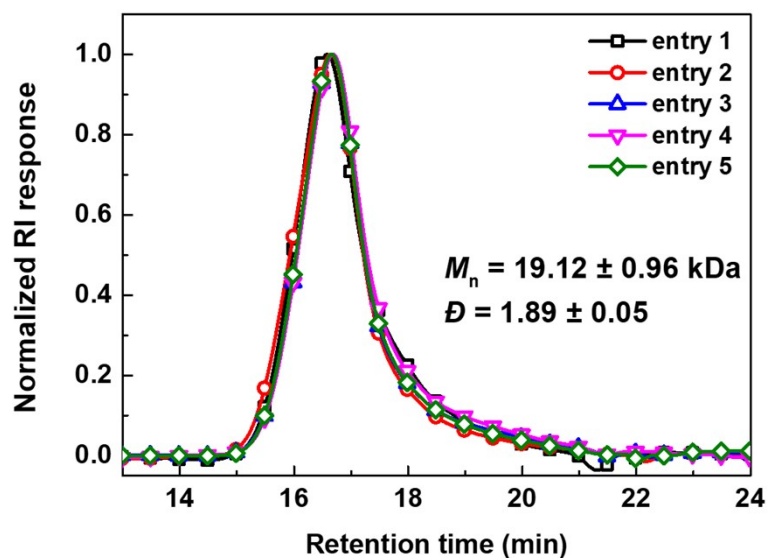

**Figure S7.** Normalized GPC traces of five repeated runs of PTB7 synthesis in flow at the same reaction conditions. (90 mg of Pd/C in the column reactor, reaction temperature of 120 °C, and residence time of ca. 30 min)

**Table S5.** The amount of the palladium before and after the reaction.

| Mean Data: Pd/C      |                          |                    |          |                    |          |       |  |
|----------------------|--------------------------|--------------------|----------|--------------------|----------|-------|--|
| Analyte              | Mean Corrected Intensity | Calib. Conc. Units | Std.Dev. | Sample Conc. Units | Std.Dev. | RSD   |  |
| Pd 340.458           | 2453180.7                | 24.58 mg/L         | 0.514    | 79820 ppm          | 1669.9   | 2.09% |  |
| Si 251.611           | 26093.6                  | 0.232 mg/L         | 0.0018   | 752.4 ppm          | 5.89     | 0.78% |  |
| Mean Data: Pd/C used |                          |                    |          |                    |          |       |  |
| Analyte              | Mean Corrected Intensity | Calib. Conc. Units | Std.Dev. | Sample Conc. Units | Std.Dev. | RSD   |  |
| Pd 340.458           | 1928155.8                | 19.43 mg/L         | 0.440    | 62680 ppm          | 1419.8   | 2.26% |  |
| Si 251.611           | 132062.5                 | 1.205 mg/L         | 0.0224   | 3885 ppm           | 72.4     | 1.86% |  |

**Table S6.** The amount of the palladium residue in polymer samples after the reaction.

| Mean Data: Pd/C(hetero flow)                |                          |                    |          |                    |          |       |  |
|---------------------------------------------|--------------------------|--------------------|----------|--------------------|----------|-------|--|
| Analyte                                     | Mean Corrected Intensity | Calib. Conc. Units | Std.Dev. | Sample Conc. Units | Std.Dev. | RSD   |  |
| Pd 340.458                                  | 1428.9                   | 0.042 mg/L         | 0.0004   | 423.1 ppm          | 3.79     | 0.90% |  |
| Mean Data: Pd(PPh) <sub>4</sub> (homo flow) |                          |                    |          |                    |          |       |  |
| Analyte                                     | Mean Corrected Intensity | Calib. Conc. Units | Std.Dev. | Sample Conc. Units | Std.Dev. | RSD   |  |
| Pd 340.458                                  | 131862.7                 | 1.583 mg/L         | 0.0230   | 1439 ppm           | 20.9     | 1.45% |  |

| Mean Data: Pd/C + TPP (flow) |                          | Calib.      |          | Sample      |          | Std.Dev. | RSD   |
|------------------------------|--------------------------|-------------|----------|-------------|----------|----------|-------|
| Analyte                      | Mean Corrected Intensity | Conc. Units | Std.Dev. | Conc. Units | Std.Dev. |          |       |
| Pd 340.458                   | 17214.6                  | 0.221 mg/L  | 0.0009   | 585.8 ppm   | 2.39     |          | 0.41% |

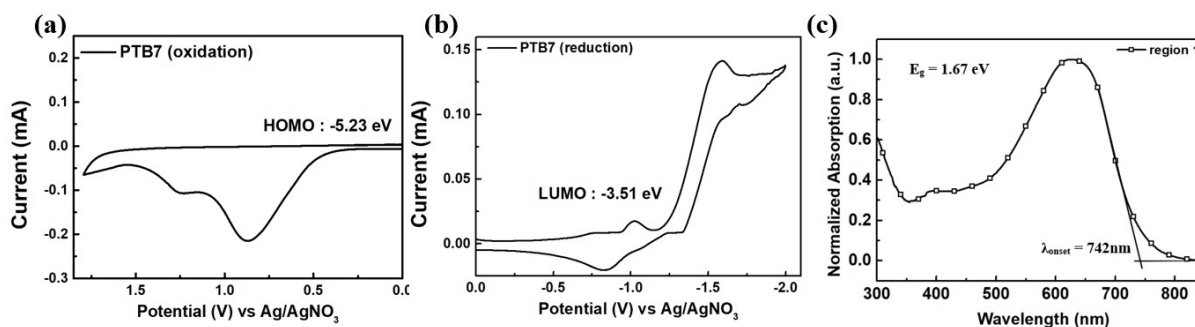

**Figure S8.** Cyclic voltammograms of PTB7 thin film in 0.1 M Bu<sub>4</sub>NPF<sub>6</sub> solution in acetonitrile, oxidation scans (a) and reduction scans (b), and UV-vis absorption spectrum of PTB7 as a thin film on glass substrate (c).

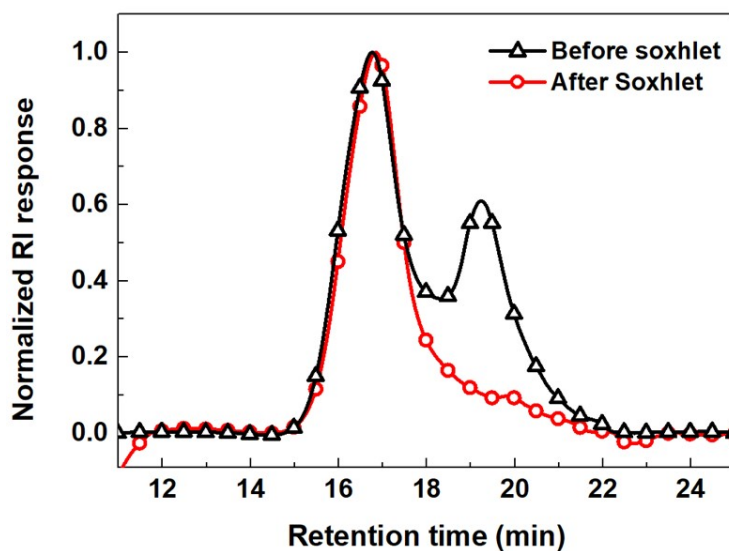

**Figure S9.** Normalized GPC traces of before and after Soxhlet of PTB7 product using Pd/C in batch reactor.



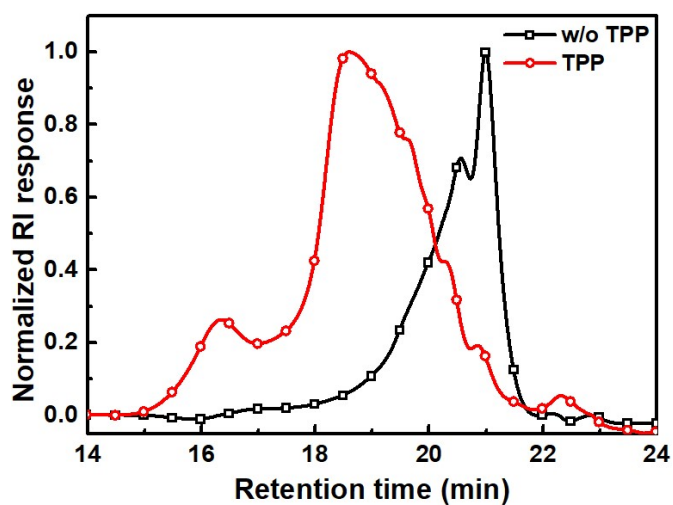

**Figure S10.** Normalized GPC traces of PTB7 products synthesized with reused Pd/C with triphenylphosphine (TPP) (red line) and without TPP (black line).

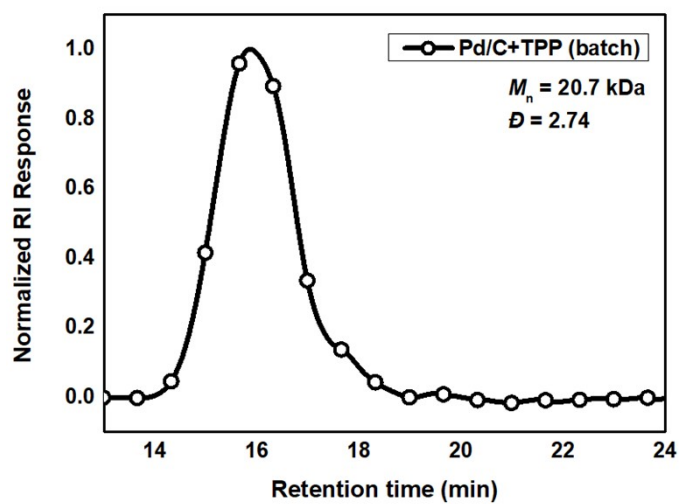

**Figure S11.** Normalized GPC trace of PTB7 product using Pd/C with TPP in batch reactor.
